# Supplementary material
Source: Springer Nature journal article supplement (https://www.springermedizin.de/resource/supplementary/12986_2010_312_MOESM7_ESM.pdf/25655808)

**KAT8**

.....GTA**K**SVT.....

120

**KAT2B**

.....QP**K**KKPL.....

320

**KAT3A/3B**

.....SR**H**KKLMF.....

382

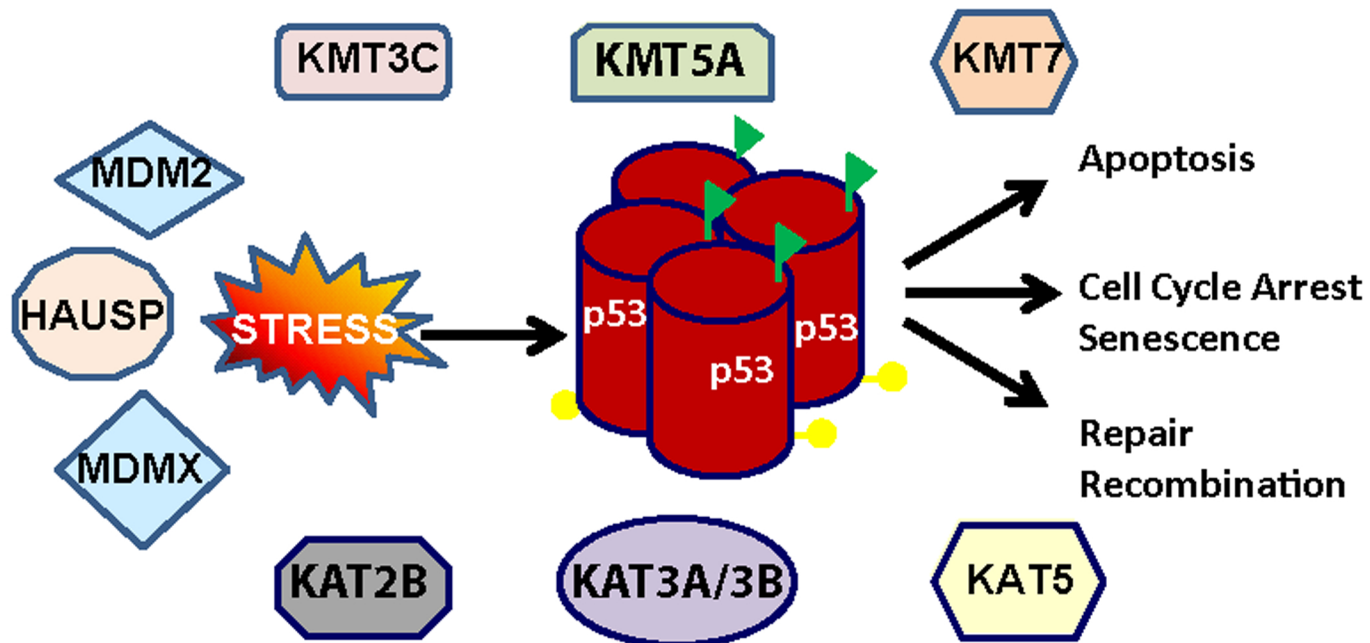

Supplement: MOESM7 [file 25655808]
